# Supplementary material
Source: PubMed Central journal article supplement (PMC7329587)
Supplement: NIHMS1547622-supplement-1.pdf [file NIHMS1547622-supplement-1.pdf]

## Supplementary Appendix

Supplementary methods:

### Variants calling in WES samples:

Bioinformatics analysis of exome sequencing data was performed using our WES pipeline as previously described<sup>1</sup>. Briefly, our pipeline uses Trimmomatic (v.0.35) and BWA (v. 0.5.9) to trim and align sequenced reads to the reference genome (hg19); GATK and Picard (<http://broadinstitute.github.io/picard/>) to perform local realignment around small insertions and deletions (indels) and to mark read duplicates, respectively.

Next, GATK was applied to assess capture efficiency and coverage for all samples. Mean coverage for all consensus coding sequence (CCDS) in each sample can be found in Supplementary Table 7. Normal and tumor samples were analyzed in parallel. Potential somatic substitutions, single nucleotide variants (SNVs) and indels, were called using Mutect (see <https://confluence.broadinstitute.org/display/CGATools/MuTect> for method) and IndelLocator (see <https://confluence.broadinstitute.org/display/CGATools/Indelocator> for methods) on the basis of BWA alignments and were then annotated with ANNOVAR<sup>2</sup>.

### Interpretation of plausible cancer susceptibility variants:

Those variants which most likely damage the protein (nonsense, canonical splice-site, coding indels and missense) were considered for further analysis. To remove common variants and false positive calls, candidate mutations were subjected to several filtering steps and eliminated if they fulfilled any one of the following criteria: (i) genomic position of variant covered by <3-reads, (ii) <4 reads supported the alternative variant, (iii) variant had allelic ratio <10% for SNVs or <15% for indels, (iv) variant quality < 20; (v) variant had allele frequency > 0.01 in gNOMAD/ExAC databases (release 0.3 2016-01-13) and EVS > 0.01, or seen as homozygote in ExAC database (release 0.3 2016-01-13) (vi) a CADD score < 20<sup>3</sup>. To further interpret missense variants we categorized them using two algorithms in parallel (a) we established a scoring system based of pathogenicity likelihood according to 5 bioinformatic algorithms (SIFT, PolyPhen, MutationTaster, Revel, MCAP) prioritizing variants considered likely pathogenic by 3 or more algorithms and (b) we used the Cancer Genome Interpreter (CGI) that classifies variants according to their potential as drivers (<https://www.cancergenomeinterpreter.org>)<sup>4-8</sup>. Those variants known to be reported in cancer or predicted tier 1 according to CGI were also prioritized independently of the scoring system. If the variant is predicted pathogenic by the scoring system but CGI considered it driver tier 2, passenger, non-protein affecting or neutral for oncogenesis we investigated its plausible relation with cancer by a search in public databases and literature review, including frequency of the variant in cancer exomes, expression of the gene in thyroid tissue and previously reported data on the variant in particular. Variants localized near the canonical splice sites were further interrogated by splicing predictor algorithms (The Splice Site Prediction by Neural Network from the BDGP and Human Splice Finder)<sup>9,10</sup>. Finally, The Integrative Genomics Viewer was used for the manual examination and visualization of all potential candidate variant<sup>11</sup>.

In a first step we focussed on 152 known cancer susceptibility genes from Huang et al 2018<sup>12</sup>. We prioritized those genes mutated in 2 or more samples. For tumor suppressor we selected only those which at least one had a germline and a somatic hit considered likely pathogenic by our algorithm (Supplemental Table 1).

We then extended our analysis to all coding genes. In this case the analysis was performed individually in each normal and tumor pairs of samples (Supplemental Tables 2-7).

### **Interpretation of plausible somatic driver variants:**

For this analysis we focused on the 468 cancer panel gene list elaborated by the MSK-IMPACT<sup>TM</sup> to compare driver genes involved in adult PDTC with those in our pediatric cases<sup>13</sup>. First all germline variants were filtered out. Then the most likely damaging variants were filtered and classified as described above.

### **ExomeAI-**

Using ExomeAI software and the aforementioned WES data, we searched for genomic CNV events in Chromosome 14 where *DICER1* locus is in these tumors<sup>14</sup>. Briefly, ExomeAI reconstructs genomic allelic imbalance (AI) events by analyzing the exome-wide *B* allele frequency (BAF) profile.

### **Supplementary References**

- 1 Rivera B, Fahiminiya S, Rabinowicz S, Watters, AK, Leventer R, Levental M, et al. SMO Syndrome: A Unifying Molecular Diagnosis That Suggests Therapeutic Opportunities. *JCO Precis Oncol*. 2018;;1–6.
- 2 Wang K, Li M, Hakonarson H. ANNOVAR: functional annotation of genetic variants from high-throughput sequencing data. *Nucleic Acids Res*. 2010;38:e164.
- 3 Rentzsch P, Witten D, Cooper GM, Shendure J, Kircher M. CADD: predicting the deleteriousness of variants throughout the human genome. *Nucleic Acids Res*. 2019;47:D886–D894.
- 4 Schwarz JM, Rödelberger C, Schuelke M, Seelow D. MutationTaster evaluates disease-causing potential of sequence alterations. *Nat Methods*. 2010;7:575–576.
- 5 Kircher M, Witten DM, Jain P, O’Roak BJ, Cooper GM, Shendure J. A general framework for estimating the relative pathogenicity of human genetic variants. *Nat Genet*. 2014;46:310–315.
- 6 Jagadeesh KA, Wenger AM, Berger MJ, Guturu H, Stenson PD, Cooper DN, et al. M-CAP eliminates a majority of variants of uncertain significance in clinical exomes at high sensitivity. *Nat Genet*. 2016;48:1581–1586.
- 7 Kumar P, Henikoff S, Ng PC. Predicting the effects of coding non-synonymous variants on protein function using the SIFT algorithm. *Nat Protoc*. 2009;4:1073–1081.
- 8 Adzhubei IA, Schmidt S, Peshkin L, Ramensky VE, Gerasimova A, Bork P, et al. A method and server for predicting damaging missense mutations. *Nat Methods*. 2010;7:248–249.

- 9 Reese MG, Eeckman FH, Kulp D, Haussler D. Improved splice site detection in Genie. *J Comput Biol J Comput Mol Cell Biol.* 1997;4:311–323.
- 10 Desmet FO, Hamroun D, Lalande M, Collod-Beroud G, Claustres M, Beroud C. Human Splicing Finder: an online bioinformatics tool to predict splicing signals. *Nucleic Acids Res.* 2009;37:e67.
- 11 Robinson JT, Thorvaldsdóttir H, Winckler W, Guttman M, Lander ES, Getz G, et al. Integrative genomics viewer. *Nat Biotechnol.* 2011;29:24–26.
- 12 Huang KL, Mashl RJ, Wu Y, Ritter D, Wang J, Oh C, et al. Pathogenic Germline Variants in 10,389 Adult Cancers. *Cell.* 2018;173:355-370.e14.
- 13 Landa I, Ibrahimasic T, Boucai L, Sinha R, Knauf JA, Shah RH, et al. Genomic and transcriptomic hallmarks of poorly differentiated and anaplastic thyroid cancers. *J Clin Invest.* 2016;126:1052–1066.
- 14 Nadaf J, Majewski J, Fahiminiya S. ExomeAI: detection of recurrent allelic imbalance in tumors using whole-exome sequencing data. *Bioinforma.* 2015;31:429–431.

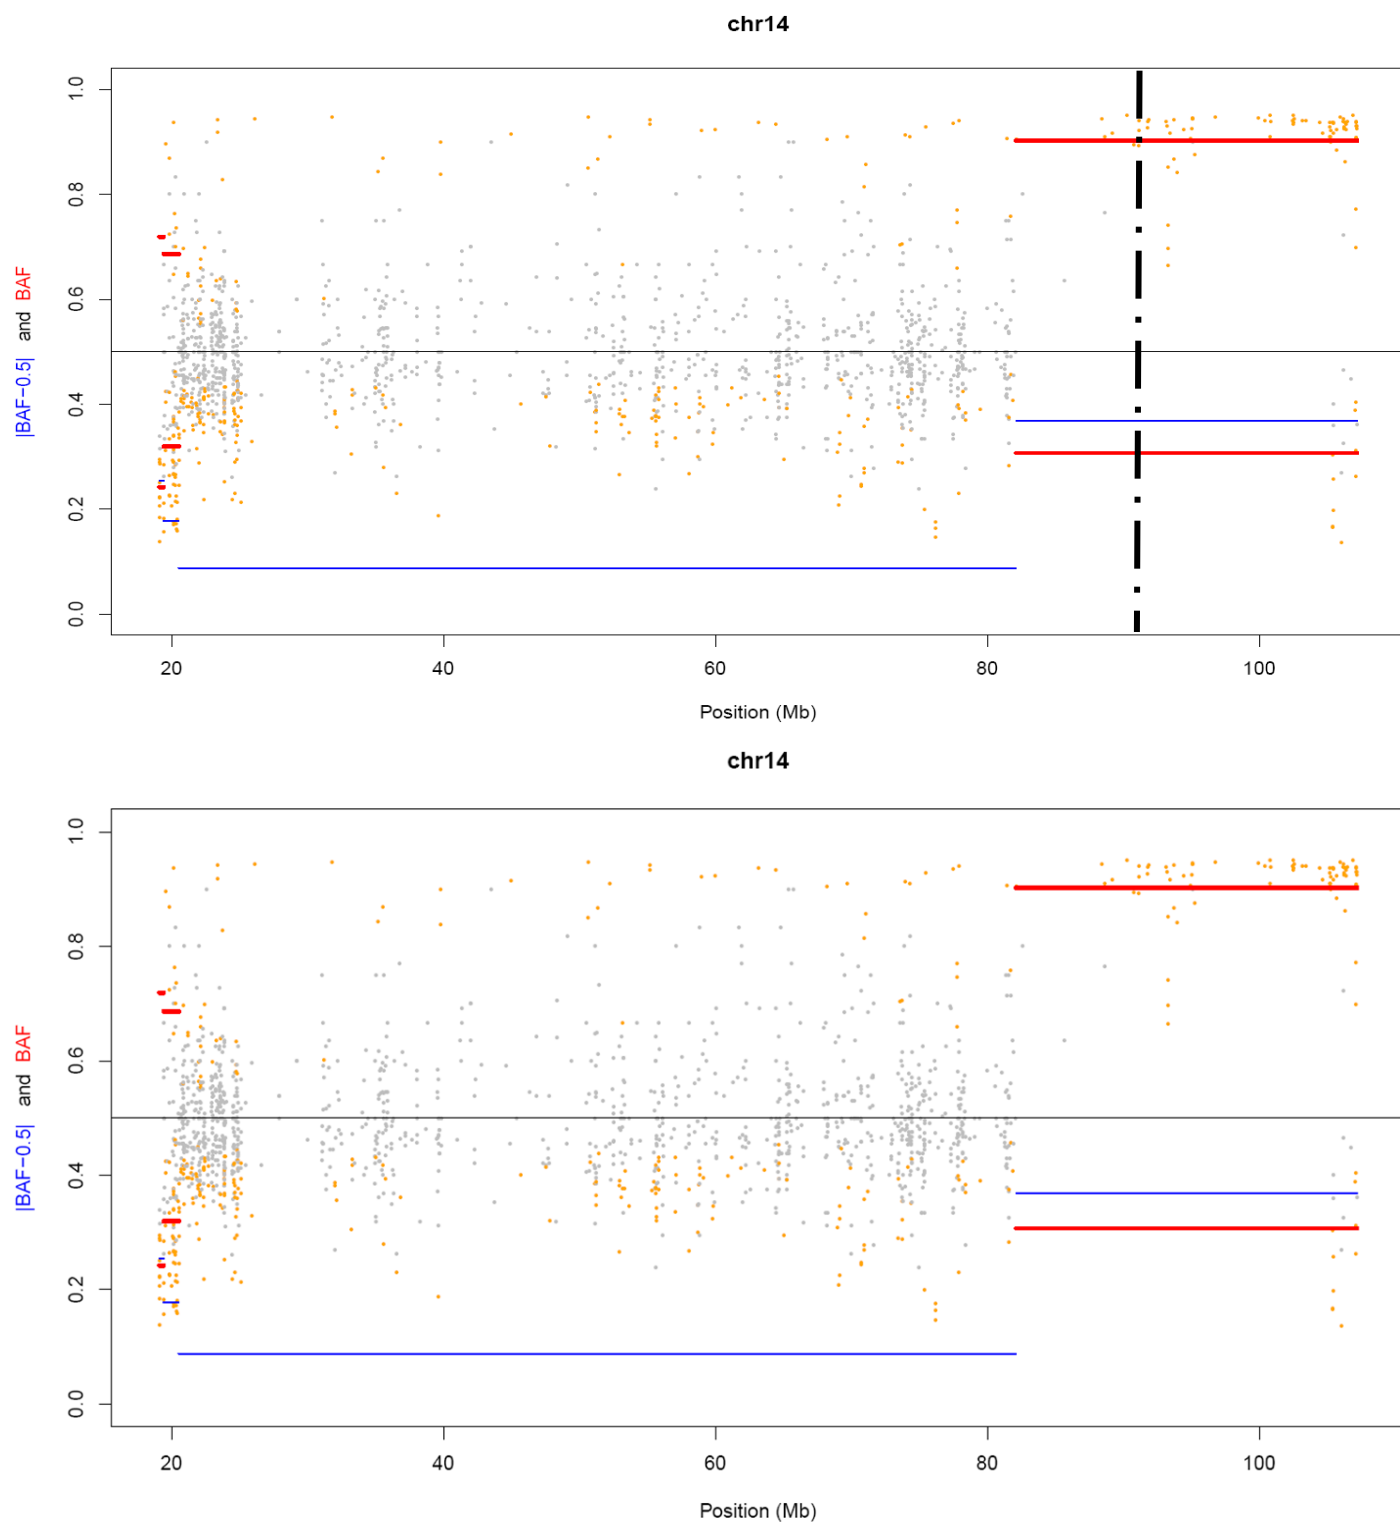

**eFigure 1: Tumor sample from individual case 4.** ExomeAI shows allelic imbalances affecting a large segments of chromosome 14q where DICER1 is localized ( marked by a vertical dotted line) . In this case, the mutant allele at c.G5437A;p.E1813Q showed a variant allele frequency of 95.7%.

**Supplemental Table 8. Literature review of pediatric poorly differentiated thyroid carcinoma**

| <b>Publication</b>             | <b>Turin criteria</b> | <b>Patient age</b> | <b>Sex</b> | <b>Stage</b> | <b>Patient Status</b> | <b>Length of follow up (mo)</b> |
|--------------------------------|-----------------------|--------------------|------------|--------------|-----------------------|---------------------------------|
| 1. Sironi et al (1992)         | NA                    | 16                 | F          | T4bN1MX      | AWD                   | 78                              |
| 2. Kotiloglu et al (1995)      | NA                    | 14                 | F          | T3N0M0       | AWOD                  | 60                              |
| 3. Hassoun et al (1997)        | NA                    | 15                 | F          | T3N1M0       | AWOD                  | 22                              |
| 4. Hassoun et al (1997)        | NA                    | 16                 | F          | NA           | DOD                   | 31                              |
| 5. Pilotti et al (1997)        | NA                    | 17                 | F          | T4N1M0       | Alive <sup>b</sup>    | 114                             |
| 6. Rodriguez et al (1998)      | NA                    | 14                 | F          | T1N0M0       | AWOD                  | 68                              |
| 7. Rodriguez et al (1998)      | NA                    | 11                 | M          | T2N0M0       | AWOD                  | 42                              |
| 8. Takeuchi et al (1999)       | NA                    | 20                 | M          | NA           | AWOD                  | 130                             |
| 9. Takeuchi et al (1999)       | NA                    | 9                  | F          | NA           | AWOD                  | 122                             |
| 10. Lam et al (2000)           | NA                    | 15                 | F          | NA           | Alive <sup>b</sup>    | 336                             |
| 11. Lo et al (2000)            | NA                    | 15                 | F          | NA           | AWOD                  | 312                             |
| 12. Lo et al (2000)            | Yes                   | 15                 | M          | At least T3  | DOD                   | 3                               |
| 13. Zettinig et al (2000)      | NA                    | 14                 | F          | TxNXM1       | AWOD                  | 288                             |
| 14. Rijhwani and Satish (2003) | NA                    | 10                 | F          | T3N1MX       | NA                    | NA                              |
| 15. Yusuf et al (2003)         | NA                    | 15                 | F          | T3           | AWOD                  | 24                              |
| 16. Kumagai et al (2006)       | NA                    | 12                 | F          | T3NXMX       | NA                    | NA                              |
| 17. Prommegger et al (2006)    | NA                    | 7                  | F          | T3N1MX       | AWOD                  | 48                              |
| 18. Donnellan et al (2009)     | NA <sup>a</sup>       | 4                  | F          | T3N1M1       | Alive <sup>b</sup>    | 12                              |
| 19. Wu et al (2011)            | Yes                   | 9                  | M          | T2N0M0       | AWOD                  | 5                               |
| 20. Hod et al (2013)           | Yes                   | 16                 | NA         | NA           | NA                    | NA                              |
| 21. Liu et al (2015)           | NA                    | 16                 | M          | TXN1M1       | DOD                   | 20                              |
| 22. Mitsutake et al (2015)     | NA                    | NA                 | NA         | NA           | NA                    | NA                              |
| 23. Norlen et al (2015)        | NA                    | NA                 | NA         | NA           | NA                    | NA                              |
| 24. Win et al (2017)           | Yes                   | 20                 | F          | NA           | AWOD                  | >60                             |
| 25. Mao et al (2017)           | NA                    | >12                | NA         | NA           | Alive <sup>b</sup>    | 60                              |

NA = Not assessable; Mo = Months; AWD= alive with disease; AWOD = alive without disease

<sup>a</sup>Histopathology images provided in case report are most consistent with papillary rather than poorly differentiated thyroid carcinoma

<sup>b</sup>Disease status uncertain
